# Supplementary material
Source: PubMed Central journal article supplement (PMC5056811)

## 1 **Repository Text**

## 2 **Methods**

### 3 **Cell lines and Transfections**

4 IL-6R expressing Cos-7 (Origene) cells and U3A cells (provided by G. Stark, Cleveland  
5 Clinic, Ohio), were used. The cells were maintained in complete Dulbecco modified Eagle  
6 medium (DMEM; Life technologies, NY) supplemented with 10% FCS, 2mM L-glutamine,  
7 HEPES and antibiotics. Transient transfections were carried out using either electroporation  
8 (Lonza, Germany) or Lipofectamine 2000® transfection reagent (Life technologies, NY)  
9 following manufacturers' protocol.

### 10 **Plasmids and constructs**

11 Plasmid encoding Myc-DDK tagged wild type STAT3 transcript variant 1 was purchased  
12 from Origene Technologies, MD, USA (RC215836). Point mutations were introduced in the wild  
13 type sequences using point mutagenesis PCR and the resulting PCR products were cloned into  
14 the pCM6-XL4 background (BioInnovatise, Rockville, MD). Endotoxin-free plasmid  
15 preparations were made using Endo Free plasmid kits purchased from Qiagen (Germany).

### 16 **STAT3 phosphorylation assay**

17 Cells transfected with plasmids encoding wild type or mutant *STAT3* were stimulated with  
18 oncostatin M (OSM; 50ng/ml) or IL-6 in increasing concentrations (20ng, 100ng, 200ng,  
19 1,000ng) for 30 min at 37°C. Cells were then fixed with 4% paraformaldehyde (Electron  
20 Microscopy Sciences, PA), permeabilized with 100% methanol and stained for STAT3 (BD  
21 APC) and phosphoSTAT3 (BD AF 488, pY705). Fold induction of phosphoSTAT3 (Y705) in  
22 OSM or IL-6 stimulated cells over non-stimulated cells was calculated using the geometric mean

23 of the fluorescent values and the fluorescent values are denoted as MFI values (Mean  
24 Fluorescent Intensity).

25 All data were acquired on either FACS Calibur or BD LSR Fortessa (BD Biosciences). A  
26 minimum of 50,000 counts were acquired within the live cell population gate for each tube. Data  
27 were analyzed using FlowJo version 9 (Tree Star Inc.).

### 28 **Protein Models**

29 The 3D models of STAT3 were generated using I-TASSER server. The electrostatic potential  
30 was calculated with APBS and displayed using UCSF Chimera.

31

32 **References**

- 33 E1. Chandesris MO, Melki I, Natividad A, Puel A, Fieschi C, Yun L, et al. Autosomal  
34 dominant STAT3 deficiency and hyper-IgE syndrome: molecular, cellular, and clinical  
35 features from a French national survey. *Medicine (Baltimore)* 2012; 91:e1-19.
- 36 E2. Jerez A, Clemente MJ, Makishima H, Rajala H, Gómez-Seguí I, Olson T, et al. STAT3  
37 mutations indicate the presence of subclinical T-cell clones in a subset of aplastic anemia  
38 and myelodysplastic syndrome patients. *Blood* 2013; 122:2453-9.
- 39 E3. Schimke LF, Sawalle-Belohradsky J, Roesler J, Wollenberg A, Rack A, Borte M, et al.  
40 Diagnostic approach to the hyper-IgE syndromes: immunologic and clinical key findings  
41 to differentiate hyper-IgE syndromes from atopic dermatitis. *J Allergy Clin Immunol*  
42 2010; 126:611-7.e1.
- 43 E4. Ohgami RS, Ma L, Monabati A, Zehnder JL, Arber DA. STAT3 mutations are present in  
44 aggressive B-cell lymphomas including a subset of diffuse large B-cell lymphomas with  
45 CD30 expression. *Haematologica* 2014; 99:e105-e.
- 46 E5. Heimall J, Davis J, Shaw PA, Hsu AP, Gu W, Welch P, et al. Paucity of Genotype-  
47 phenotype correlations in STAT3 mutation positive Hyper IgE Syndrome (HIES).  
48 *Clinical immunology (Orlando, Fla.)* 2011; 139:75-84.
- 49 E6. Holland SM, DeLeo FR, Elloumi HZ, Hsu AP, Uzel G, Brodsky N, et al. STAT3  
50 mutations in the hyper-IgE syndrome. *N Engl J Med* 2007; 357:1608-19.
- 51 E7. Koskela HL, Eldfors S, Ellonen P, van Adrichem AJ, Kuusanmäki H, Andersson EI, et  
52 al. Somatic STAT3 mutations in large granular lymphocytic leukemia. *N Engl J Med*  
53 2012; 366:1905-13.

- 54 E8. Liu JY, Li Q, Chen TT, Guo X, Ge J, Yuan LX. Destructive pulmonary staphylococcal  
55 infection in a boy with hyper-IgE syndrome: a novel mutation in the signal transducer  
56 and activator of transcription 3 (STAT3) gene (p.Y657S). *Eur J Pediatr* 2011; 170:661-6.
- 57 E9. Ives ML, Ma CS, Palendira U, Chan A, Bustamante J, Boisson-Dupuis S, et al. STAT3  
58 mutations underlying autosomal dominant hyper-IgE syndrome impair human CD8(+) T  
59 cell memory formation and function. *The Journal of allergy and clinical immunology*  
60 2013; 132:400-11.e9.
- 61 E10. Couronné L, Scourzic L, Pilati C, Valle VD, Duffourd Y, Solary E, et al. STAT3  
62 mutations identified in human hematologic neoplasms induce myeloid malignancies in a  
63 mouse bone marrow transplantation model. *Haematologica* 2013; 98:1748-52.
- 64 E11. Kristensen T, Larsen M, Rewes A, Frederiksen H, Thomassen M, Møller MB. Clinical  
65 Relevance of Sensitive and Quantitative STAT3 Mutation Analysis Using Next-  
66 Generation Sequencing in T-Cell Large Granular Lymphocytic Leukemia. *The Journal of*  
67 *Molecular Diagnostics* 2014; 16:382-92.
- 68 E12. Pilati C, Amessou M, Bihl MP, Balabaud C, Nhieu JT, Paradis V, et al. Somatic  
69 mutations activating STAT3 in human inflammatory hepatocellular adenomas. *J Exp*  
70 *Med* 2011; 208:1359-66.
- 71 E13. Milner JD, Vogel TP, Forbes L, Ma CA, Stray-Pedersen A, Niemela JE, et al. Early-onset  
72 lymphoproliferation and autoimmunity caused by germline STAT3 gain-of-function  
73 mutations. *Blood* 2015; 125:591-9.

74

75

76

77 **Supplementary figure legend**

78 **Figure E1**

79 Previously reported *STAT3* mutations by *STAT3* domain. Hypomorphic dominant negative  
80 mutations found in HIES (Job's) patients are indicated in purple; hypermorphic gain of function  
81 mutations found in leukemia or lymphoma patients are in green; hypermorphic gain of function  
82 mutations found in autoimmune disorders are in orange.

83

84

**Figure E1**

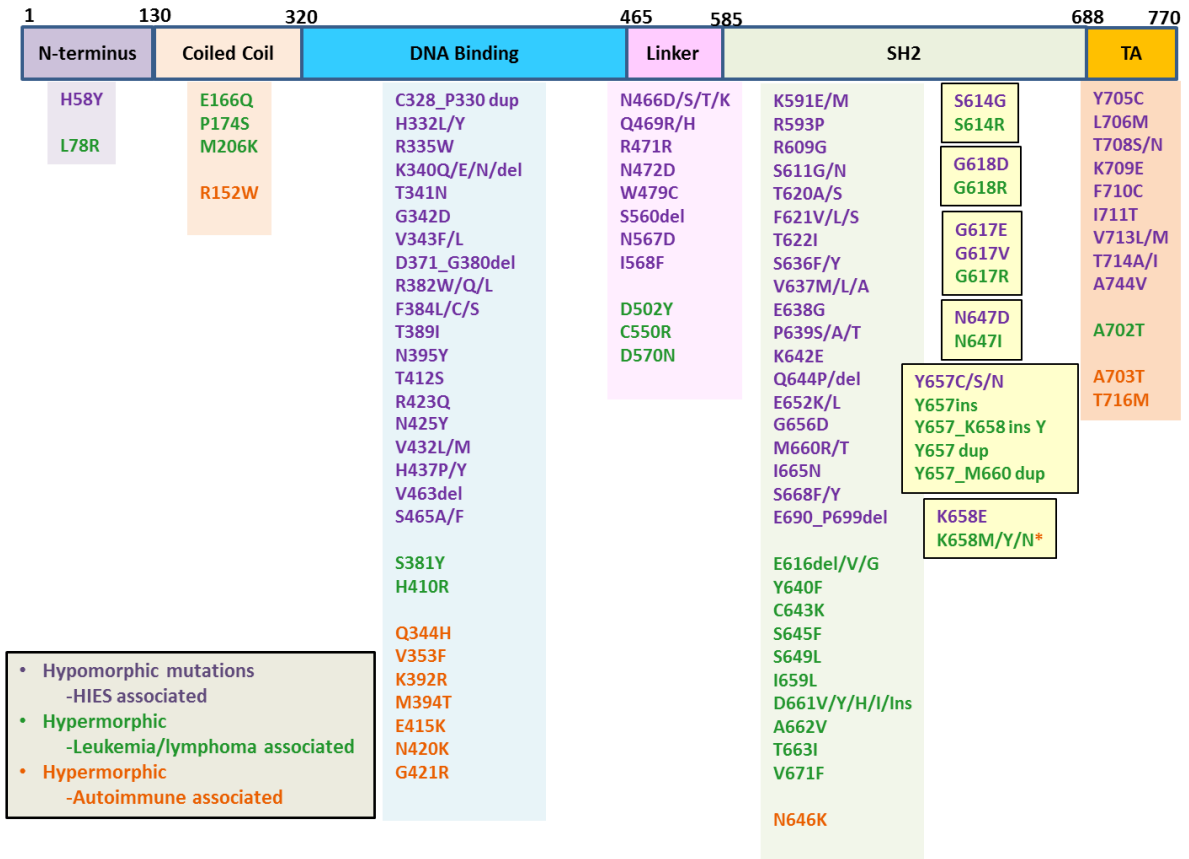

Supplement: NIHMS798284-supplement-supplement_1.pdf [file NIHMS798284-supplement-supplement_1.pdf]
